# Supplementary material for: High‐production dairy cattle exhibit different rumen and fecal bacterial community and rumen metabolite profile than low‐production cattle
Source: PubMed Central journal article supplement (PMC6460281; doi:10.1002/mbo3.673), 2018-09-11

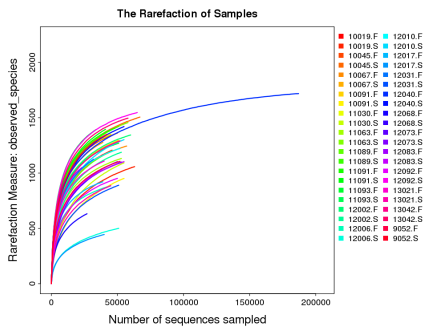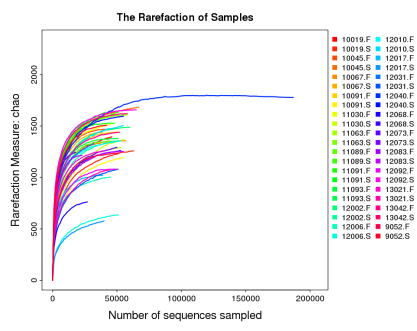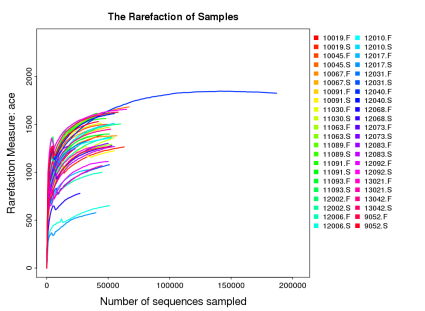

Supplement: MBO3-8-e00673-s001.pdf [file MBO3-8-e00673-s001.pdf]
